# Supplementary material for: Mapping Gene-by-Gene Single-Nucleotide Variation in 8,535 Mycobacterium tuberculosis Genomes: a Resource To Support Potential Vaccine and Drug Development
Source: PubMed Central journal article supplement (PMC8546714; doi:10.1128/msphere.01224-20), 2021-03-10

Tree scale:

**Colored ranges**

- Lineage 1
- Lineage 2
- Lineage 3
- Lineage 4
- Lineage 5
- Lineage 6
- Lineage 7

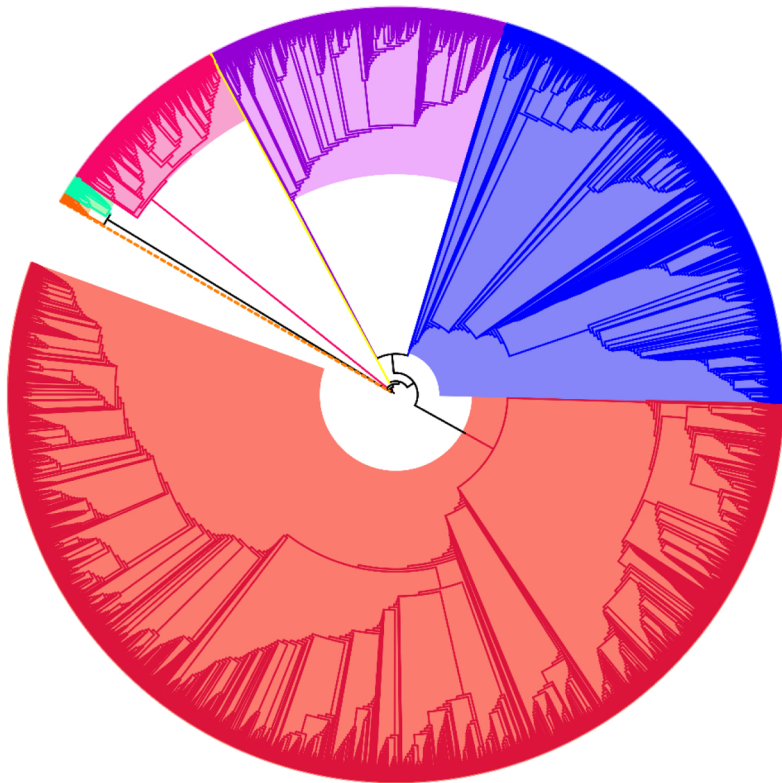

Supplement: msphere.01224-20-sf001.pdf [file msphere.01224-20-sf001.pdf]
