# Supplementary material for: Mapping Gene-by-Gene Single-Nucleotide Variation in 8,535 Mycobacterium tuberculosis Genomes: a Resource To Support Potential Vaccine and Drug Development
Source: PubMed Central journal article supplement (PMC8546714; doi:10.1128/msphere.01224-20), 2021-03-10

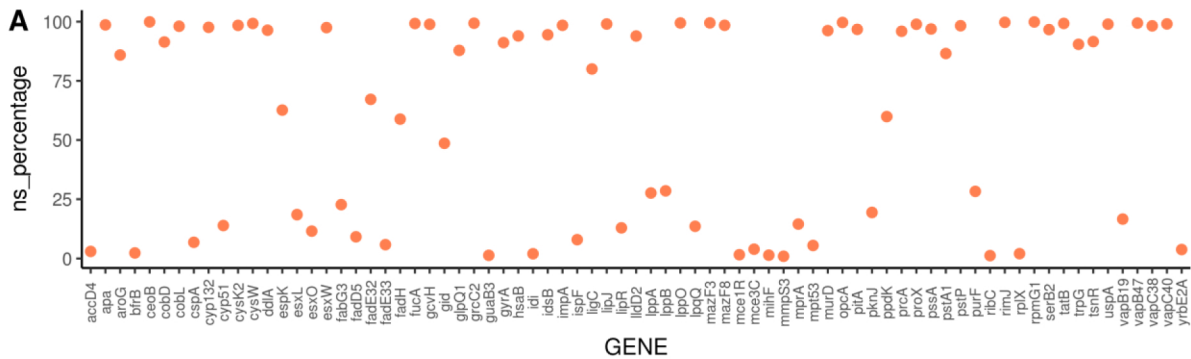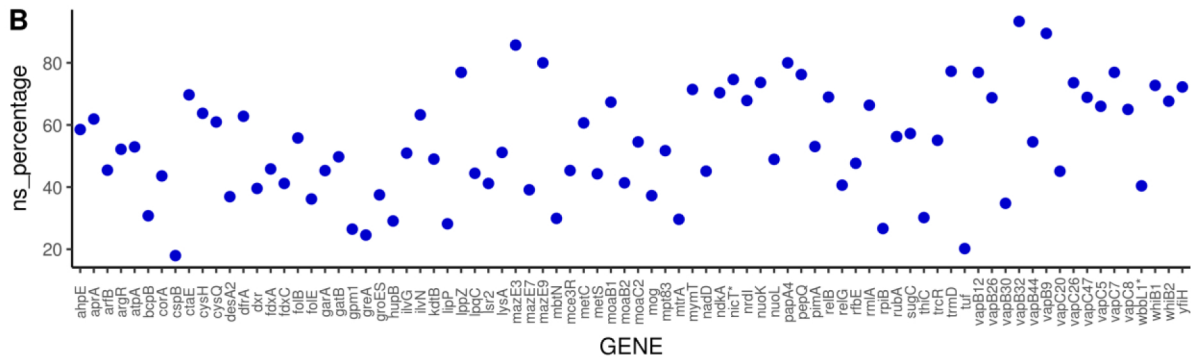

Supplement: msphere.01224-20-sf003.pdf [file msphere.01224-20-sf003.pdf]
