# Supplementary material for: Mapping Gene-by-Gene Single-Nucleotide Variation in 8,535 Mycobacterium tuberculosis Genomes: a Resource To Support Potential Vaccine and Drug Development
Source: PubMed Central journal article supplement (PMC8546714; doi:10.1128/msphere.01224-20), 2021-03-10
Supplement: msphere.01224-20-st002.pdf [file msphere.01224-20-st002.pdf]

**Table S2.**

| <b>TUBERCULIST-95th</b>                   | <b>95<sup>th</sup> (%)</b> | <b>COGs<sup>b</sup>-95<sup>th</sup></b> | <b>95<sup>th</sup> (%)</b> |
|-------------------------------------------|----------------------------|-----------------------------------------|----------------------------|
| Cell wall and cell processes <sup>a</sup> | 24.2 %                     | Poorly characterised                    | 39.2%                      |
| Hypotheticals & Unknown                   | 33.9 %                     | Metabolic proteins                      | 34.4%                      |
| Information pathways                      | 4.3 %                      | Information storage                     | 15.1%                      |
| Intermediary metabolism & respiration     | 19.4 %                     | Cellular processes & signalling         | 11.3%                      |
| Lipid metabolism                          | 4.3 %                      |                                         |                            |
| Regulatory proteins                       | 4.84 %                     |                                         |                            |
| Virulence, detoxification, adaptation     | 6.45 %                     |                                         |                            |
| Insertion seqs & phages                   | 2.69 %                     |                                         |                            |
| <b>TUBERCULIST-5th</b>                    | <b>5<sup>th</sup> (%)</b>  | <b>COGs<sup>b</sup>-5th</b>             | <b>5<sup>th</sup> (%)</b>  |
| Cell wall and cell processes              | 11.8 %                     | Poorly characterised                    | 39.8%                      |
| Hypotheticals & Unknown                   | 34.4 %                     | Metabolic proteins                      | 29%                        |
| Information pathways                      | 7.53 %                     | Information storage                     | 22.6%                      |
| Intermediary metabolism & respiration     | 21.5 %                     | Cellular processes & signalling         | 8.6%                       |
| Lipid Metabolism                          | 2.15 %                     |                                         |                            |
| Regulatory proteins                       | 6.45 %                     |                                         |                            |
| Virulence, detoxification, adaptation     | 12.4 %                     |                                         |                            |
| Insertion seqs & phages                   | 3.76 %                     |                                         |                            |
