# Supplementary material for: Mapping Gene-by-Gene Single-Nucleotide Variation in 8,535 Mycobacterium tuberculosis Genomes: a Resource To Support Potential Vaccine and Drug Development
Source: PubMed Central journal article supplement (PMC8546714; doi:10.1128/msphere.01224-20), 2021-03-10
Supplement: msphere.01224-20-st003.pdf [file msphere.01224-20-st003.pdf]

**Table S3.**

| <b>Groups of genes</b>                           | <b>Genes-5<sup>th</sup></b> | <b>Genes-95<sup>th</sup></b> | <b>X<sup>2a</sup></b> | <b>p-value<sup>e</sup></b> |
|--------------------------------------------------|-----------------------------|------------------------------|-----------------------|----------------------------|
| <b><u>COGs categories<sup>b</sup></u></b>        |                             |                              |                       |                            |
| Cellular processes & signalling                  | 16                          | 21                           | 0.48019               | 0.4883                     |
| Information storage & processing                 | 42                          | 28                           | 2.9739                | 0.08462                    |
| Poorly characterised                             | 74                          | 73                           | 0                     | 1                          |
| Metabolism                                       | 54                          | 64                           | 1.0053                | 0.316                      |
| <b><u>Tuberculist categories<sup>c</sup></u></b> |                             |                              |                       |                            |
| Cell & cell wall processes                       | 22                          | 45                           | 8.8108                | 0.002995                   |
| Hypotheticals/unknown                            | 64                          | 63                           | 0                     | 1                          |
| Information pathways                             | 14                          | 8                            | 1.2078                | 0.2718                     |
| Intermediate metabolism/ respiration             | 40                          | 36                           | 0.14883               | 0.6997                     |
| Virulence, detoxification, adaptation            | 23                          | 12                           | 3.1539                | 0.07575                    |
| Insertion seqs & phages                          | 7                           | 5                            | 0.086111              | 0.7692                     |
| Lipid Metabolism                                 | 4                           | 8                            | 0.775                 | 0.3787                     |
| Regulatory proteins                              | 12                          | 9                            | 0.20187               | 0.6532                     |
| <b><u>Other categories</u></b>                   |                             |                              |                       |                            |
| Toxin-antitoxin <sup>d</sup>                     | 17                          | 5                            | 5.0244                | 0.02499                    |
| ESAT6/ESX                                        | 0                           | 4                            | 2.2745                | 0.1315                     |
| Resistance genes                                 | 1                           | 7                            | 3.1937                | 0.07392                    |
| Induced under stress <sup>d</sup>                | 34                          | 9                            | 14.932                | 0.0001115                  |
