# Supplementary material for: Mapping Gene-by-Gene Single-Nucleotide Variation in 8,535 Mycobacterium tuberculosis Genomes: a Resource To Support Potential Vaccine and Drug Development
Source: PubMed Central journal article supplement (PMC8546714; doi:10.1128/msphere.01224-20), 2021-03-10
Supplement: msphere.01224-20-st004.pdf [file msphere.01224-20-st004.pdf]

**Table S4.**

| <b>GENE <sup>a</sup></b>  | <b>FUNCTION</b>         | <b>STRESS</b>             | <b>OUTCOME</b>   |
|---------------------------|-------------------------|---------------------------|------------------|
| <i>cspA</i>               | Cold-shock protein      | Low temperature           | Upregulation (1) |
| <i>bfrB</i>               | Ferritin                | Hypoxia, iron-stress      | Upregulation (2) |
| <i>cysW</i>               | Sulfate ABC transporter | Starvation                | Upregulation (3) |
| <i>vapC40<sup>b</sup></i> | Toxin (TA system)       | Starvation, drugs         | Upregulation (4) |
| <i>vapB47<sup>b</sup></i> | Antitoxin (TA system)   | Drugs                     | Upregulation (4) |
| <i>vapB19<sup>b</sup></i> | Antitoxin (TA system)   | Starvation                | Upregulation (5) |
| <i>vapC38<sup>b</sup></i> | Toxin (TA system)       | Starvation                | Upregulation (5) |
| <i>mazF8<sup>b</sup></i>  | Antitoxin (TA system)   | Various stress            | Upregulation (5) |
| <i>mazF3<sup>b</sup></i>  | Toxin (TA system)       | Starvation, drugs, low ph | Upregulation (4) |

## References:

1. D'Auria G, Esposito C, Falcigno L, Calvanese L, Iaccarino E, Ruggiero A, Pedone C, Pedone E, Berisio R. 2010. Dynamical properties of cold shock protein A from *Mycobacterium tuberculosis*. *Biochem Biophys Res Commun* 402:693–698.
2. Khare G, Nangpal P, Tyagi AK. 2017. Differential Roles of Iron Storage Proteins in Maintaining the Iron Homeostasis in *Mycobacterium tuberculosis*. *PLoS One* 12:e0169545.
3. Hatzios SK, Bertozzi CR. 2011. The regulation of sulfur metabolism in *Mycobacterium tuberculosis*. *PLoS Pathog* 7:e1002036.
4. Gupta A, Venkataraman B, Vasudevan M, Gopinath Bankar K. 2017. Coexpression network analysis of toxin-antitoxin loci in *Mycobacterium tuberculosis* reveals key modulators of cellular stress. *Sci Rep* 7:1–14.
5. Sala A, Bordes P, Genevaux P. 2014. Multiple Toxin-Antitoxin Systems in *Mycobacterium tuberculosis*. *Toxins (Basel)* 6:1002–1020.
