# Supplementary material for: Mapping Gene-by-Gene Single-Nucleotide Variation in 8,535 Mycobacterium tuberculosis Genomes: a Resource To Support Potential Vaccine and Drug Development
Source: PubMed Central journal article supplement (PMC8546714; doi:10.1128/msphere.01224-20), 2021-03-10
Supplement: msphere.01224-20-st005.pdf [file msphere.01224-20-st005.pdf]

**Table S5**

| <b>GENE <sup>a</sup></b>   | <b>FUNCTION</b>                    | <b>STRESS</b>                | <b>OUTCOME</b>      |
|----------------------------|------------------------------------|------------------------------|---------------------|
| <i>FdxA</i> <sup>c</sup>   | ferredoxin-redox                   | hypoxia                      | Upregulation (1)    |
| <i>mymT</i> <sup>c</sup>   | metallothionein-redox              | high copper, NO              | Upregulation (2)    |
| <i>cysQ</i> <sup>c</sup>   | Sulfur metabolism-redox            | nutrient starvation          | Upregulation (3)    |
| <i>cysH</i> <sup>c</sup>   | Sulfur metabolism-redox            | nutrient starvation,H2O2     | Upregulation (3)    |
| <i>moaB1</i> <sup>c</sup>  | Molybdenum metabolism-redox        | hypoxia, NO                  | Upregulation (4)    |
| <i>mog</i> <sup>c</sup>    | Molybdenum metabolism-redox        | hypoxia                      | Upregulation (4)    |
| <i>whiB1</i> <sup>c</sup>  | transcriptional regulator-redox    | nitric oxide                 | Downregulation (5)  |
| <i>whiB2</i> <sup>c</sup>  | transcriptional regulator-redox    | hypoxia                      | Downregulation (5)  |
| <i>groES</i> <sup>c</sup>  | heat shock protein                 | heat                         | Upregulation (6)    |
| <i>Tuf</i> <sup>c</sup>    | elongation factor                  | hypoxia                      | Upregulation (7)    |
| <i>cspB</i>                | cold shock protein                 | cold                         | Upregulation        |
| <i>ilvG</i> <sup>c</sup>   | acetolactate synthase              | hypoxia, low ph              | Upregulation (8)    |
| <i>ilvN</i> <sup>c</sup>   | acetolactate synthase              | hypoxia                      | Downregulation (8)  |
| <i>aprA</i> <sup>c</sup>   | acid & phagosome regulated protein | low ph                       | Upregulated (9)     |
| <i>arfABC</i> <sup>c</sup> | ph regulator                       | low ph                       | Transformation (10) |
| <i>Isr2</i> <sup>c</sup>   | transcriptional regulator          | hypoxia                      | Upregulation (11)   |
| <i>relB</i> <sup>b</sup>   | TA - Antitoxin                     | low ph, drugs                | Upregulation (12)   |
| <i>relG</i> <sup>b</sup>   | TA - Toxin                         | Nitrogen stress              | Upregulation (12)   |
| <i>mazE9</i> <sup>b</sup>  | TA - Antitoxin                     | low ph, drugs                | Upregulation (12)   |
| <i>vapB26</i> <sup>b</sup> | TA - Antitoxin                     | nutrient starvation          | Upregulation (12)   |
| <i>vapB44</i> <sup>b</sup> | TA - Antitoxin                     | nutrient starvation          | Upregulation (12)   |
| <i>vapC5</i> <sup>b</sup>  | TA - Toxin                         | nutrient starvation          | Upregulation (13)   |
| <i>vapB12</i> <sup>b</sup> | TA - Antitoxin                     | starvation, low ph, drugs    | Upregulation (12)   |
| <i>vapB9</i> <sup>b</sup>  | TA - Antitoxin                     | starvation, drugs            | Upregulation (12)   |
| <i>vapC33</i> <sup>b</sup> | TA - Toxin                         | drugs                        | Upregulation(12)    |
| <i>vapC8</i> <sup>b</sup>  | TA - Toxin                         | drugs                        | Upregulation(12)    |
| <i>vapC7</i> <sup>b</sup>  | TA - Toxin                         | starvation, low ph, drugs    | Upregulation(12)    |
| <i>vapC26</i> <sup>b</sup> | TA - Toxin                         | starvation, drugs            | Upregulation(12)    |
| <i>vapC20</i> <sup>b</sup> | TA - Toxin                         | drugs                        | Upregulation(12)    |
| <i>vapB30</i> <sup>b</sup> | TA - Antitoxin                     | starvation, low ph (4.8)-24h | Upregulation(12)    |
| <i>vapB32</i> <sup>b</sup> | TA - Antitoxin                     | starvation, low ph, drugs    | Upregulation(12)    |
| <i>mazE7</i> <sup>b</sup>  | TA - Antitoxin                     | starvation, drugs            | Upregulation(12)    |
| <i>mazE3</i> <sup>b</sup>  | TA - Antitoxin                     | starvation, low ph, drugs    | Upregulation(12)    |
| <i>vapC47</i> <sup>b</sup> | TA - Toxin                         | starvation, low ph, drugs    | Upregulation(12)    |

## References

1. Ramage HR, Connolly LE, Cox JS. 2009. Comprehensive Functional Analysis of Mycobacterium tuberculosis Toxin-Antitoxin Systems: Implications for Pathogenesis, Stress Responses, and Evolution. *PLoS Genet* 5:e1000767.
2. Gold B, Deng H, Bryk R, Vargas D, Eliezer D, Roberts J, Jiang X, Nathan C. 2008. Identification of a Copper-Binding Metallothionein in Pathogenic Mycobacteria. *Nat Chem Biol* 4:609–616.
3. Hatzios SK, Bertozzi CR. 2011. The regulation of sulfur metabolism in Mycobacterium tuberculosis. *PLoS Pathog* 7:e1002036.
4. Levillain F, Poquet Y, Mallet L, Mazères S, Marceau M, Brosch R, Bange F-C, Supply P, Magalon A, Neyrolles O. 2017. Horizontal acquisition of a hypoxia responsive molybdenum cofactor biosynthesis pathway contributed to Mycobacterium tuberculosis pathoadaptation. *PLOS Pathog* 13:e1006752.
5. Alam MS, Garg SK, Agrawal P. 2009. Studies on structural and functional divergence among seven WhiB proteins of Mycobacterium tuberculosis H37Rv. *FEBS J* 276:76–93.
6. Aravindhan V, Christy AJ, Roy S, Ajitkumar P, Narayanan PR, Narayanan S. 2009. Mycobacterium tuberculosis groE promoter controls the expression of the bicistronic *groESL1* operon and shows differential regulation under stress conditions. *FEMS Microbiol Lett* 292:42–49.
7. Starck J, Kä llenius G, Marklund B-I, Andersson DI. 2004. Comparative proteome analysis of Mycobacterium tuberculosis grown under aerobic and anaerobic conditions. *Microbiology* 150:3821–3829.
8. Singh V, Chandra D, Srivastava BS, Srivastava R. 2011. Biochemical and transcription analysis of acetohydroxyacid synthase isoforms in

*Mycobacterium tuberculosis* identifies these enzymes as potential targets for drug development. *Microbiology* 157:29–37.

9. Abramovitch RB, Rohde KH, Hsu F-F, Russell DG. 2011. *aprABC*: A *Mycobacterium tuberculosis* complex-specific locus that modulates pH-driven adaptation to the macrophage phagosome. *Mol Microbiol* 80:678–694.
10. Yao Y, Barghava N, Kim J, Niederweis M, Marassi FM. 2012. Molecular structure and peptidoglycan recognition of *Mycobacterium tuberculosis* ArfA (Rv0899). *J Mol Biol* 416:208–220.
11. Bartek IL, Woolhiser LK, Baughn AD, Basaraba RJ, Jacobs WR, Lenaerts AJ, Voskuil MI, Voskuil MI. 2014. *Mycobacterium tuberculosis* Lsr2 is a global transcriptional regulator required for adaptation to changing oxygen levels and virulence. *MBio* 5:e01106-14.
12. Gupta A, Venkataraman B, Vasudevan M, Gopinath Bankar K. 2017. Co-expression network analysis of toxin-antitoxin loci in *Mycobacterium tuberculosis* reveals key modulators of cellular stress. *Sci Rep* 7:1–14.
13. Sala A, Bordes P, Genevaux P. 2014. Multiple Toxin-Antitoxin Systems in *Mycobacterium tuberculosis*. *Toxins (Basel)* 6:1002–1020.
